# Supplementary material
Source: PubMed Central journal article supplement (PMC2654606)
Supplement: NIHMS79588-supplement-01.pdf [file NIHMS79588-supplement-01.pdf]

## Supplemental Data

### Microsporidia Evolved

### from Ancestral Sexual Fungi

Soo Chan Lee, Nicolas Corradi, Edmond J. Byrnes III, Santiago Torres-Martinez, Fred S. Dietrich, Patrick J. Keeling, and Joseph Heitman

**Table S1.** Relaxed synteny conserved in *R. oryzae* and *E. cuniculi*.

| <i>R. oryzae</i><br>proteins | <i>E. cuniculi</i><br>proteins | blast<br>score | e value  | <i>R. oryzae</i><br>proteins | <i>E. cuniculi</i><br>proteins | blast<br>score | e value  |
|------------------------------|--------------------------------|----------------|----------|------------------------------|--------------------------------|----------------|----------|
| RO3G_00003                   | gi 19068537                    | 124            | 7.00E-30 | RO3G_05865                   | gi 19168645                    | 40             | 9.00E-04 |
| RO3G_00004                   | gi 19069234                    | 42             | 7.00E-05 | RO3G_05866                   |                                |                |          |
| RO3G_00005                   |                                |                |          | RO3G_05867                   |                                |                |          |
| RO3G_00006                   | gi 19068534                    | 57             | 3.00E-09 | RO3G_05868                   | gi 19168651                    | 125            | 8.00E-30 |
| RO3G_00009                   | gi 19170836                    | 117            | 2.00E-28 | RO3G_06214                   | gi 19168723                    | 191            | 1.00E-49 |
| RO3G_00010                   | gi 19170838                    | 52             | 5.00E-09 | RO3G_06215                   |                                |                |          |
| RO3G_01355                   | gi 19171027                    | 102            | 2.00E-23 | RO3G_06216                   |                                |                |          |
| RO3G_01356                   | gi 19171031                    | 46             | 1.00E-06 | RO3G_06217                   |                                |                |          |
| RO3G_01357                   |                                |                |          | RO3G_06218                   |                                |                |          |
| RO3G_01358                   |                                |                |          | RO3G_06219                   |                                |                |          |
| RO3G_01359                   |                                |                |          | RO3G_06220                   |                                |                |          |
| RO3G_01360                   | gi 19171024                    | 250            | 1.00E-67 | RO3G_06221                   | gi 19168720                    | 124            | 4.00E-30 |
| RO3G_02423                   | gi 19168763                    | 82             | 1.00E-17 | RO3G_07828                   | gi 19068701                    | 70             | 1.00E-13 |
| RO3G_02424                   |                                |                |          | RO3G_07829                   |                                |                |          |
| RO3G_02425                   | gi 19069007                    | 59             | 3.00E-10 | RO3G_07830                   |                                |                |          |
| RO3G_02426                   |                                |                |          | RO3G_07831                   |                                |                |          |
| RO3G_02427                   |                                |                |          | RO3G_07832                   |                                |                |          |
| RO3G_02428                   | gi 19168761                    | 65             | 6.00E-12 | RO3G_07833                   |                                |                |          |
| RO3G_03308                   | gi 19068592                    | 170            | 4.00E-44 | RO3G_07834                   |                                |                |          |
| RO3G_03309                   | gi 19068589                    | 54             | 9.00E-09 | RO3G_07835                   |                                |                |          |
| RO3G_03530                   | gi 19068611                    | 236            | 2.00E-63 | RO3G_07836                   |                                |                |          |
| RO3G_03531                   |                                |                |          | RO3G_07837                   |                                |                |          |
| RO3G_03532                   | gi 19068606                    | 79             | 3.00E-16 | RO3G_07838                   |                                |                |          |
| RO3G_03533                   |                                |                |          | RO3G_07839                   | gi 19069299                    | 53             | 2.00E-09 |
| RO3G_03534                   | gi 19170972                    | 75             | 3.00E-15 | RO3G_07840                   |                                |                |          |
| RO3G_03535                   | gi 19068608                    | 58             | 1.00E-10 | RO3G_07841                   |                                |                |          |
| RO3G_04457                   | gi 19168720                    | 119            | 9.00E-29 | RO3G_07842                   | gi 19068700                    | 45             | 2.00E-06 |
| RO3G_04458                   |                                |                |          | RO3G_08158                   | gi 19170838                    | 109            | 6.00E-26 |
| RO3G_04459                   | gi 19168723                    | 104            | 5.00E-24 | RO3G_08159                   | gi 19170836                    | 119            | 6.00E-29 |
| RO3G_04463                   | gi 19068607                    | 65             | 6.00E-13 | RO3G_08282                   | gi 19170836                    | 117            | 2.00E-28 |
| RO3G_04464                   |                                |                |          | RO3G_08283                   | gi 19170838                    | 109            | 6.00E-26 |
| RO3G_04465                   |                                |                |          | RO3G_08889                   | gi 19168720                    | 61             | 3.00E-11 |
| RO3G_04466                   |                                |                |          | RO3G_08890                   |                                |                |          |
| RO3G_04467                   |                                |                |          | RO3G_08891                   |                                |                |          |
| RO3G_04468                   |                                |                |          | RO3G_08892                   | gi 19168723                    | 97             | 6.00E-22 |

|            |             |     |           |            |             |     |           |
|------------|-------------|-----|-----------|------------|-------------|-----|-----------|
| RO3G_04469 |             |     |           | RO3G_09031 | gi 19069361 | 53  | 6.00E-08  |
| RO3G_04470 | gi 19171321 | 68  | 5.00E-13  | RO3G_09032 |             |     |           |
| RO3G_04471 |             |     |           | RO3G_09033 |             |     |           |
| RO3G_04472 | gi 19068605 | 77  | 2.00E-15  | RO3G_09034 | gi 19068933 | 62  | 2.00E-11  |
| RO3G_05485 | gi 19068537 | 133 | 1.00E-32  | RO3G_09035 | gi 19069362 | 39  | 3.00E-04  |
| RO3G_05486 | gi 19171356 | 82  | 1.00E-17  | RO3G_10613 | gi 19170970 | 185 | 4.00E-48  |
| RO3G_05487 | gi 19068534 | 307 | 1.00E-84  | RO3G_10614 |             |     |           |
| RO3G_05592 | gi 19068534 | 52  | 2.00E-08  | RO3G_10615 |             |     |           |
| RO3G_05593 | gi 19068537 | 107 | 9.00E-24  | RO3G_10616 | gi 19170971 | 56  | 9.00E-10  |
| RO3G_05835 | gi 19069147 | 90  | 5.00E-20  | RO3G_10956 | gi 19069314 | 402 | 1.00E-113 |
| RO3G_05836 | gi 19069144 | 299 | 9.00E-83  | RO3G_10957 | gi 19069313 | 49  | 7.00E-07  |
| RO3G_11255 | gi 19168644 | 74  | 9.00E-15  | RO3G_13173 | gi 19068611 | 228 | 1.00E-60  |
| RO3G_11256 |             |     |           | RO3G_13174 | gi 19068608 | 58  | 1.00E-10  |
| RO3G_11257 | gi 19068701 | 51  | 7.00E-08  | RO3G_13322 | gi 19069361 | 45  | 7.00E-06  |
| RO3G_11258 |             |     |           | RO3G_13323 | gi 19170962 | 134 | 4.00E-33  |
| RO3G_11259 |             |     |           | RO3G_13324 |             |     |           |
| RO3G_11260 |             |     |           | RO3G_13325 |             |     |           |
| RO3G_11261 |             |     |           | RO3G_13326 | gi 19069362 | 56  | 3.00E-09  |
| RO3G_11262 |             |     |           | RO3G_14144 | gi 19068528 | 338 | 3.00E-94  |
| RO3G_11263 |             |     |           | RO3G_14145 |             |     |           |
| RO3G_11264 |             |     |           | RO3G_14146 |             |     |           |
| RO3G_11265 |             |     |           | RO3G_14147 | gi 19170857 | 153 | 2.00E-38  |
| RO3G_11266 |             |     |           | RO3G_14148 |             |     |           |
| RO3G_11267 |             |     |           | RO3G_14149 |             |     |           |
| RO3G_11268 | gi 19168645 | 39  | 2.00E-04  | RO3G_14150 |             |     |           |
| RO3G_12238 | gi 19069100 | 105 | 3.00E-24  | RO3G_14151 | gi 19068525 | 39  | 2.00E-04  |
| RO3G_12239 |             |     |           | RO3G_14309 | gi 19069097 | 52  | 2.00E-08  |
| RO3G_12240 |             |     |           | RO3G_14310 | gi 19069100 | 110 | 2.00E-25  |
| RO3G_12241 |             |     |           | RO3G_14965 | gi 19068691 | 37  | 5.00E-04  |
| RO3G_12242 |             |     |           | RO3G_14966 |             |     |           |
| RO3G_12243 |             |     |           | RO3G_14967 | gi 19068690 | 77  | 1.00E-15  |
| RO3G_12244 |             |     |           | RO3G_15055 | gi 19170836 | 117 | 2.00E-28  |
| RO3G_12245 |             |     |           | RO3G_15056 | gi 19170838 | 109 | 6.00E-26  |
| RO3G_12246 |             |     |           | RO3G_15651 | gi 19069192 | 180 | 7.00E-47  |
| RO3G_12247 |             |     |           | RO3G_15652 | gi 19069191 | 58  | 7.00E-10  |
| RO3G_12248 | gi 19068936 | 87  | 3.00E-18  | RO3G_15944 | gi 19069192 | 177 | 6.00E-46  |
| RO3G_12249 |             |     |           | RO3G_15945 | gi 19069191 | 55  | 3.00E-09  |
| RO3G_12250 |             |     |           | RO3G_16080 | gi 19168720 | 124 | 3.00E-30  |
| RO3G_12251 |             |     |           | RO3G_16081 |             |     |           |
| RO3G_12252 | gi 19069102 | 67  | 2.00E-12  | RO3G_16082 |             |     |           |
| RO3G_12682 | gi 19168744 | 144 | 4.00E-36  | RO3G_16083 |             |     |           |
| RO3G_12683 |             |     |           | RO3G_16084 |             |     |           |
| RO3G_12684 | gi 19069355 | 617 | 1.00E-178 | RO3G_16085 |             |     |           |
| RO3G_12685 |             |     |           | RO3G_16086 |             |     |           |
| RO3G_12686 |             |     |           | RO3G_16087 |             |     |           |
| RO3G_12687 |             |     |           | RO3G_16088 | gi 19168723 | 159 | 3.00E-40  |
| RO3G_12688 |             |     |           |            |             |     |           |
| RO3G_12689 | gi 19168742 | 71  | 1.00E-13  |            |             |     |           |
| RO3G_12888 | gi 19069579 | 420 | 1.00E-119 |            |             |     |           |

|            |             |     |          |  |  |  |  |
|------------|-------------|-----|----------|--|--|--|--|
| RO3G_12889 |             |     |          |  |  |  |  |
| RO3G_12890 |             |     |          |  |  |  |  |
| RO3G_12891 | gi 19069662 | 103 | 5.00E-23 |  |  |  |  |
| RO3G_12892 |             |     |          |  |  |  |  |
| RO3G_12893 |             |     |          |  |  |  |  |
| RO3G_12894 |             |     |          |  |  |  |  |
| RO3G_12895 | gi 19069580 | 60  | 2.00E-10 |  |  |  |  |

**Table S2.** Microsporidian genes involved in meiosis.

| Genes    | <i>E. cuniculi</i> | accession number | <i>A. locustae</i> ID | contig  | <i>E. bienersi</i> ID | contig  |
|----------|--------------------|------------------|-----------------------|---------|-----------------------|---------|
| Spo11    | ECU04_1110         | CAD25299         | ORF1088               | 273     | absent                | absent  |
| Mre11    | ECU05_1280         | CAD26648         | newly annotated       | 604     | newly annotated       | 1951    |
| Rad50    | ECU07_0610i        | CAD25593         | AAT12390              | GenBank | ORF8569               | 30      |
| Rad1     | ECU08_0760         | CAD26381         | ORF1776               | 1391    | absent                | absent  |
| Hop1     | ECU02_0890         | CAD25118         | ORF156                | 366     | absent                | absent  |
| Hop2     | absent             | absent           | absent                | absent  | absent                | absent  |
| Mnd1     | ECU10_1600         | CAD25881         | ORF2209               | 513     | newly annotated       | 1117    |
| Rad52/22 | ECU09_0930         | CAD27066         | ORF258                | 232     | N.A.                  | N.A.    |
| Dmc1     | absent             | absent           | absent                | absent  | absent                | absent  |
| Rad51    | ECU11_0820         | CAD25992         | ORF1016               | 757     | XM_00182796           | Genbank |
| Msh2     | ECU03_0540         | CAD26200         | newly annotated       | 0       | newly annotated       | 678     |
| Msh6     | ECU10_0710         | CAD25790         | newly annotated       | 1037    | ORF7694               | 168     |
| Msh4     | absent             | absent           | ORF713                | 509     | newly annotated       | 678     |
| Msh5     | absent             | absent           | absent                | absent  | absent                | absent  |
| Mlh1     | ECU05_0300         | CAD26547         | newly annotated       | 601     | ORF7777               | 367     |
| Mlh2     | absent             | absent           | newly annotated       | 2654    | absent                | absent  |
| Mlh3     | absent             | absent           | absent                | absent  | absent                | absent  |
| Pms1     | ECU11_1260         | CAD26036         | ORF1393               | 3       | ORF8252               | 169     |
| Mer3     | absent             | absent           | absent                | absent  | absent                | absent  |
| Smc1     | ECU04_0930         | CAD25280         | ORF303                | 1358    | ORF8566               | 30      |
| Smc2     | ECU04_0930         | CAD25280         | ORF303                | 1358    | ORF8566               | 30      |
| Smc3     | ECU09_1210         | CAD27164         | ORF506                | 289     | ORF7826               | 1012    |
| Smc4     | ECU07_0680         | CAD25600         | ORF2406               | 169     | ORF8576               | 30      |
| Smc5     | ECU11_2000         | CAD26110         | newly annotated       | 1454    | ORF7827               | 1012    |
| Rad18    | ECU07_0390         | CAD25571         | newly annotated       | 3       | NW_001849446          | GenBank |
| Rad21    | ECU04_1370         | CAD25326         | newly annotated       | 400     | ORF7660               | 168     |
| Rec8     | ECU07_0390         | CAD25571         | newly annotated       | 3       | NW_001849446          | GenBank |
| Pds5     | absent             | absent           | absent                | absent  | absent                | absent  |
| Scc3     | absent             | absent           | absent                | absent  | absent                | absent  |

Grey boxes indicate genes conserved in at least two microsporidia.

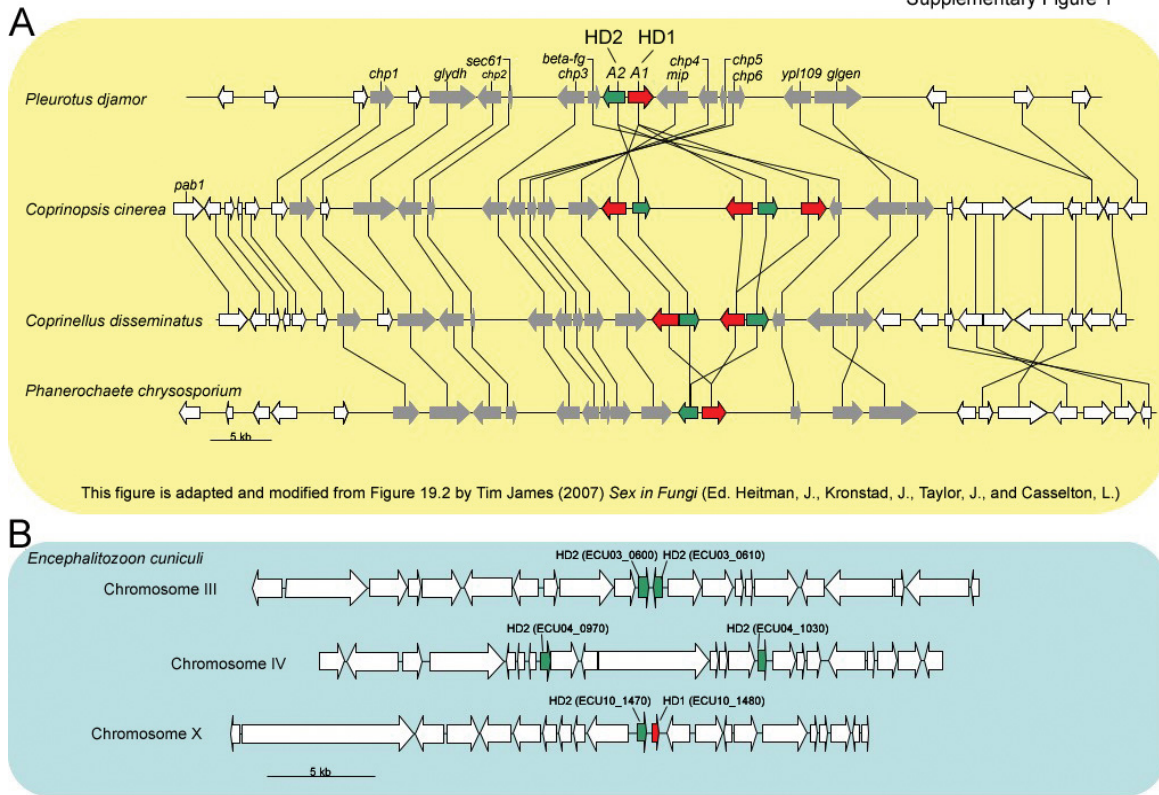

**Figure S1.** Comparison of genes surrounding homeodomain (HD) protein genes between four fungi (panel **A**) and *E. cuniculi* (panel **B**). The *E. cuniculi* genome contains three linked pairs of HD genes. 20 ORFs around the three HD pairs were compared to the A mating type locus alleles of four basidiomycetous fungi in which HD proteins [*A1* (HD1) and *A2* (HD2)] orchestrate the sexual cycle. No apparent gene homologs which flank the *MAT* locus of the basidiomycetes were identified around the *E. cuniculi* HD protein genes. Moreover, the HD genes in basidiomycete fungi are divergently transcribed, whereas the HD gene pairs of *E. cuniculi* are co-linear or convergent. Finally, the basidiomycete HD gene pairs always involve one HD1 class (green) and one HD2 class (red) protein, whereas in *E. cuniculi* only one of the three HD gene pairs matches this paradigm. Taken together, these features indicate that these pairs of HD genes are less likely to represent the *sex* locus of *E. cuniculi*.

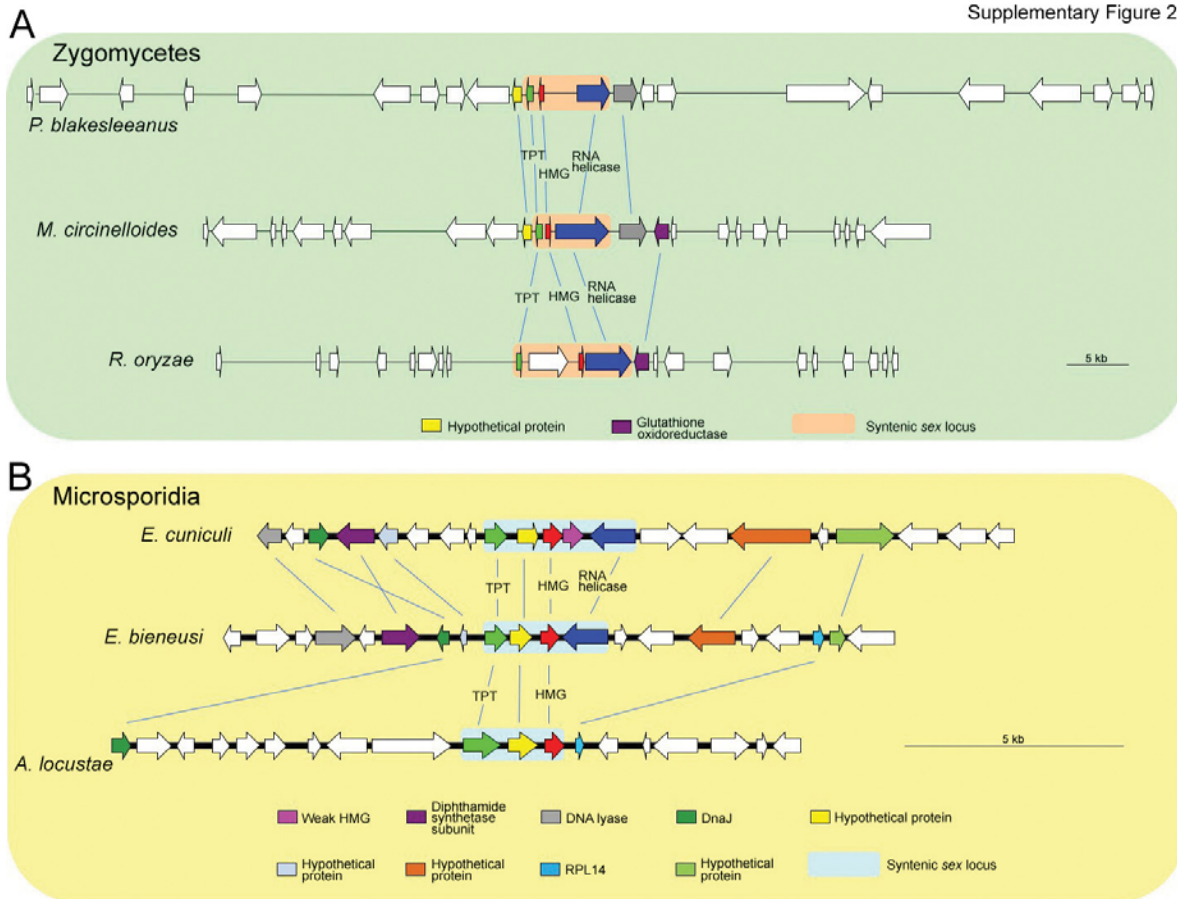

**Figure S2.** Analysis of ORFs up- and downstream of the *sex* locus of three zygomycetes and three microsporidia. **(A).** *M. circinelloides* shares two genes encoding hypothetical proteins (5' and 3' to the *sex* locus) with *P. blakesleeanus* and shares a glutathione oxidoreductase gene with *R. oryzae*, whereas there are no common genes between *P. blakesleeanus* and *R. oryzae* outside the *sex* locus. This suggests that only the TPT and RNA helicase genes are syntenic at the *sex* locus among the zygomycetes. **(B).** Additional genes are syntenic around the *sex* locus in the microsporidia. However, only the TPT, HMG, and RNA helicase genes are syntenic across the three zygomycetes and the microsporidia. The ORF information for *R. oryzae* and *E. cucinuli* was obtained from the Broad Institute/Fungal Genome Initiative (FGI). The *P. blakesleeanus* ORF information was obtained from the US Department of Energy Joint Genome Institute (DoE JGI) database. Genomic DNA sequences of *M. circinelloides* genome sequences were obtained from the DoE JGI and annotated by using FGGENESH or Orf finder at NCBI. Note: the difference in scale bars for panels **A** and **B**.

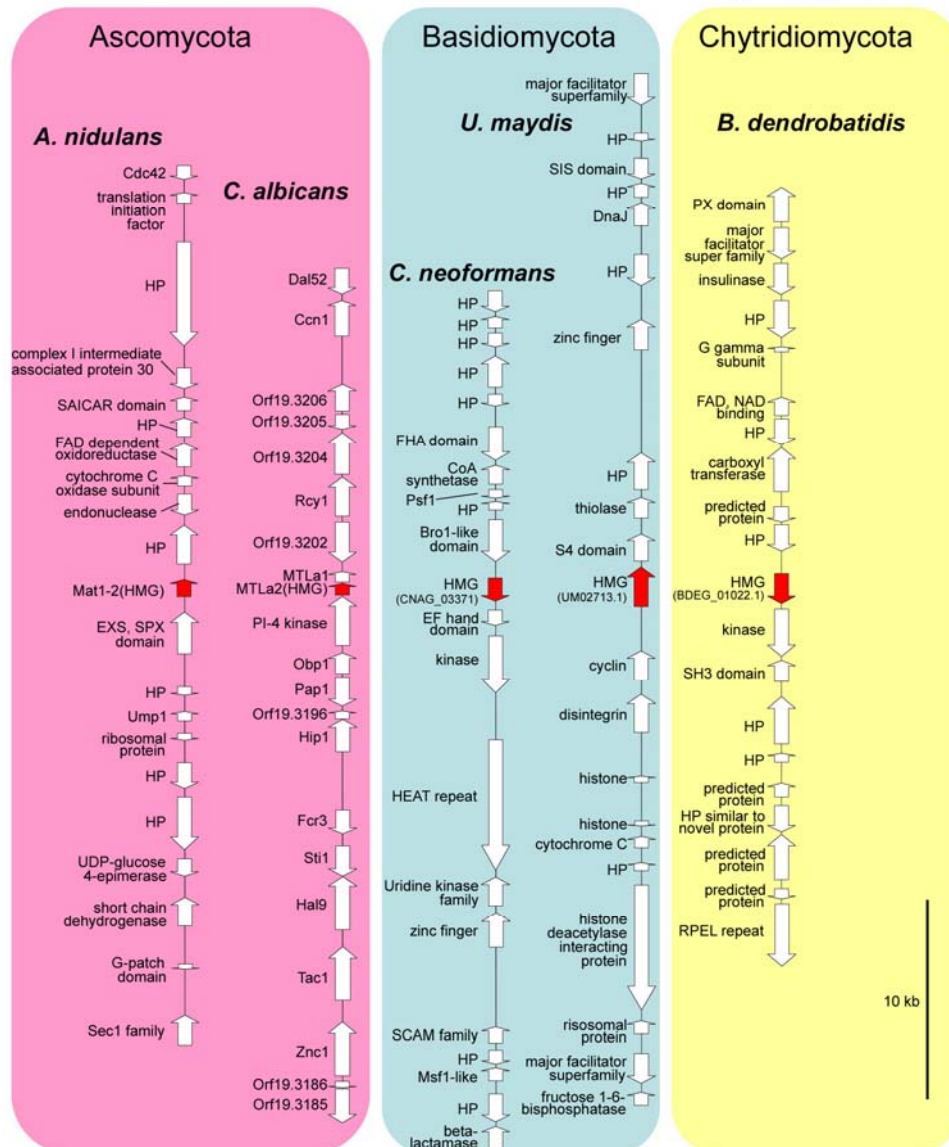

**Figure S3.** Genomic locations of *MAT*-related HMG domain protein genes of representative fungi in the Ascomycota, Basidiomycota, and Chytridiomycota phyla. HMG proteins were identified by BLASTp analysis with the *M. circinelloides* SexM protein against each fungal protein database. ORFs surrounding the most closely related HMG genes from the five fungi were analyzed. The fungi in the three phyla contain no TPT and RNA helicase genes that are syntenic with the HMG domain protein genes, indicating that syntenic TPT, HMG, and RNA helicase genes are specific to the Zygomycota. The ORF information for *Aspergillus nidulans*, *Cryptococcus neoformans* serotype A, *Ustilago maydis*, and *Batrachochytrium dendrobatidis* was acquired from the Broad Institute/FGI database. ORFs of *Candida albicans* were identified from the Candida Genome Database site. Red arrows indicate HMG proteins. HP: hypothetical protein.

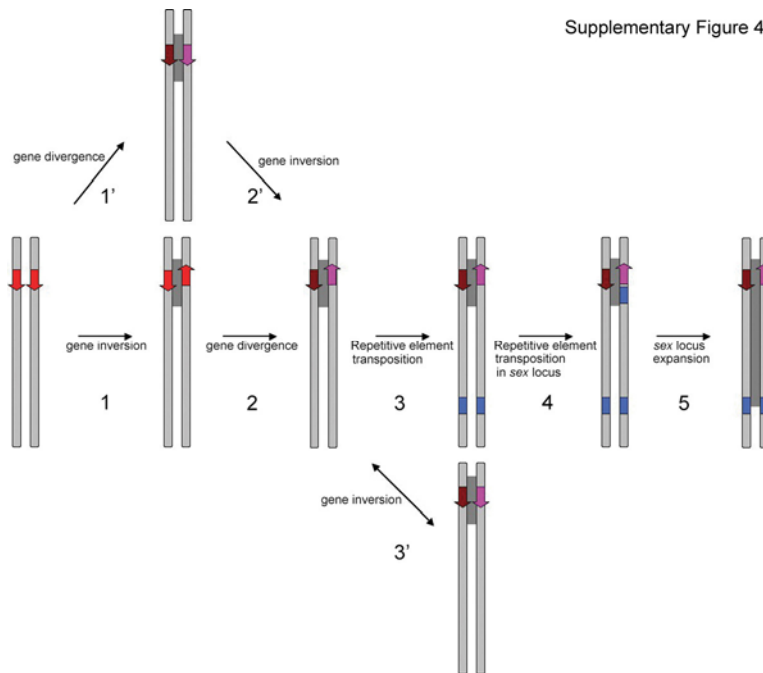

**Figure S4.** Possible models for the early steps in the evolution of sex determination and sex chromosomes. As posited by Ohno[1], in the first step, a sex determining gene emerges on an autosome. In model I (inversion-divergence model), one allele undergoes a gene inversion (1) resulting in an inhibition of recombination, enabling the inverted gene pair to diverge (2) because of a lack of recombination. A repetitive element (blue box) is integrated into the proto-sex chromosome (3) and transposition of the repetitive element occurs into one *sex* allele (4). Additional inversions due to the repetitive element enable expansion of the *sex* allele to capture the chromosome. The opposite orientation of the *sexP/M* genes of *P. blakesleanus* supports steps in this model. In model II, the order of the divergence and inversion steps is altered (divergence-inversion model). Unlike *P. blakesleanus*, the *M. circinelloides* *sex* loci encode the *sexP* and *sexM* genes in the same orientation. Thus, gene divergence (1') could precede gene inversion (2') suggesting another trajectory for the evolution of sex determining systems. Alternatively, the inverted *sexP/M* genes could have undergone a second gene inversion (3') resulting in the co-directional *sexP/M* gene pair in *M. circinelloides*.



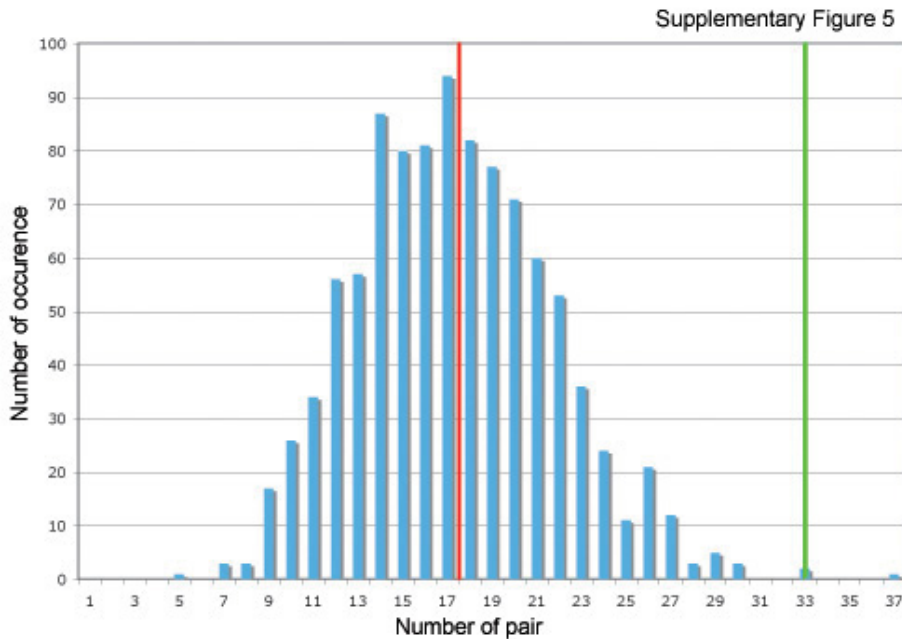

**Figure S5.** Synteny evaluation of *R. oryzae* and *E. cuniculi*. Examination of the 17,467 *R. oryzae* proteins (Broad Institute Database for *R. oryzae*) and the 1,996 *E. cuniculi* proteins[2] indicates that 3,457 *R. oryzae* proteins (20% ) have homologs in *E. cuniculi*, and 978 *E. cuniculi* proteins (49%) have homologs in *R. oryzae*, where homologs are defined as having a BLASTp E-value of less than  $1.0 \times e^{-05}$  in an alignment of the two protein sets. The discrepancy in these gene sets is in part due to gene loss in one lineage or the other, and in part due to genes being too diverged to detect by blast. Thus for gene order analysis, we use a “relaxed synteny” definition where a pair of genes between these two species is defined to be syntenic if two genes in *E. cuniculi* that have at most three intervening genes have homologs in *R. oryzae* that are separated by at most 4 genes. If one of the intervening genes in *E. cuniculi* also has a homolog in *R. oryzae*, then the *R. oryzae* genes must be in a window of less than 15 genes. A total of 33 pairs (green line) of genes meet these criteria. When 1,000 randomizations of the *E. cuniculi* gene order were generated, an average of 17.3 pairs (red line) of “relaxed syntenic” genes were identified, with a standard deviation of 4.4. The number of 33 pairs of “relaxed syntenic” genes in the authentic genomes is 3.5 standard deviations higher than the average number of pairs of “relaxed syntenic” genes observed for the randomized gene order. All analyses were done using NCBI blast program and perl.



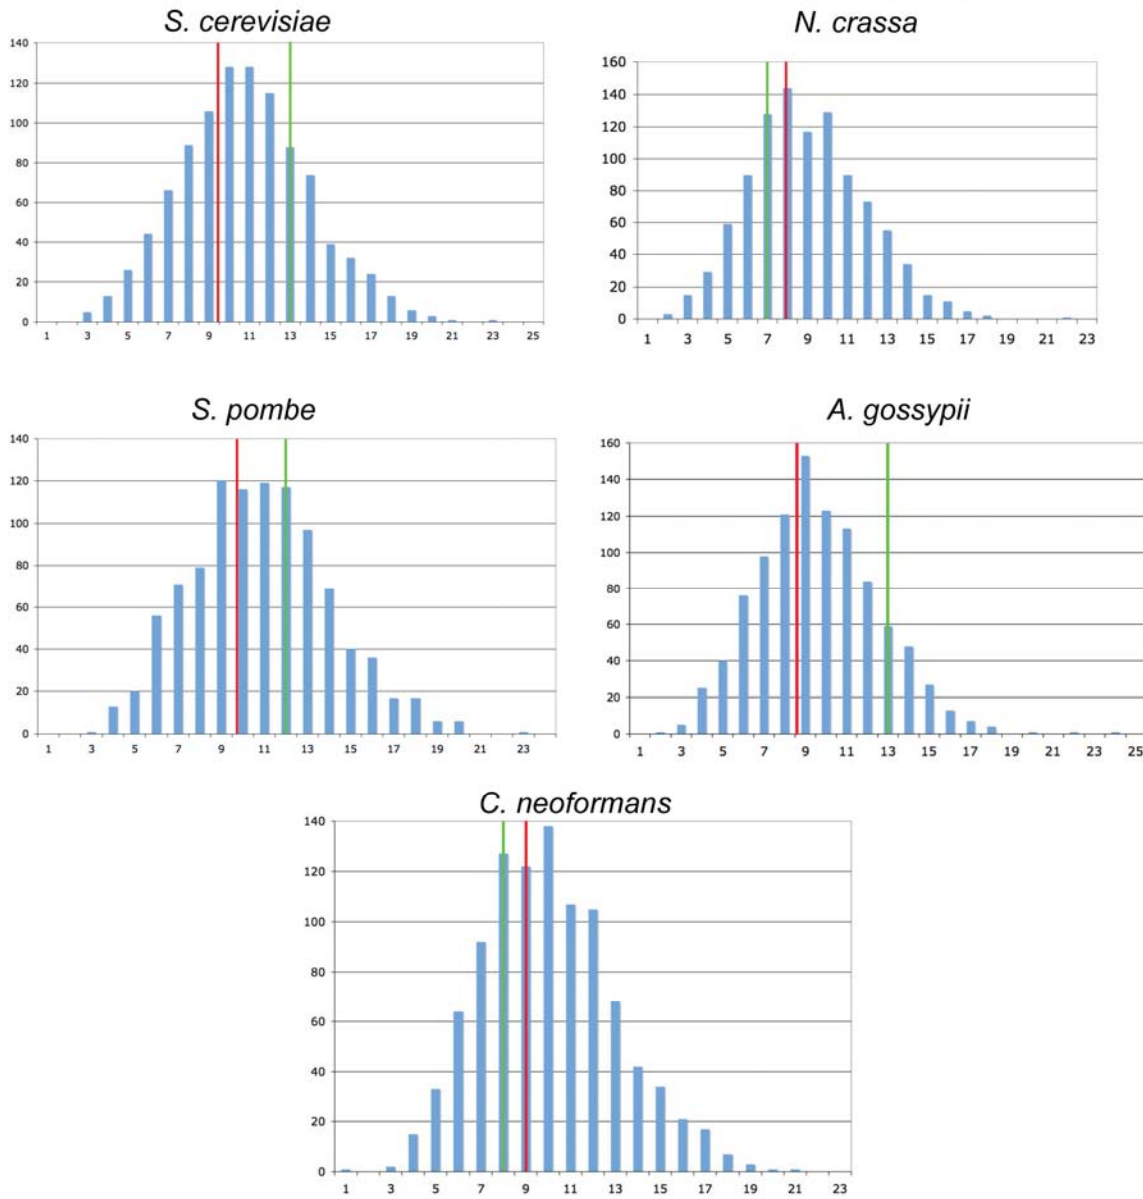

**Figure S6.** Synteny evaluation of *E. cuniculi* and other fungal lineages. To evaluate the significance of gene order conservation, the genomes of *Saccharomyces cerevisiae*, *Neurospora crassa*, *Schizosaccharomyces pombe*, *Ashbya gossypii*, and *Cryptococcus neoformans* were randomized 1000 times. Synteny was defined as described in the Figure 5S legend. Tandomly duplicated genes in each species were compressed into a single gene for purposes of this comparison. Blast cutoff threshold was  $1 \times e^{-5}$ . The numbers of gene pairs (green lines) observed between *E. cuniculi* and *S. cerevisiae* (13 pairs), *N. crassa* (7 pairs), *S. pombe* (12 pairs), *A. gossypii* (13 pairs), and *C. neoformans* (8 pairs) are not significantly different in comparison to those of the randomized gene orders (red lines, 9.79, 7.99, 9.82, 9.79, 8.59, and 9.02 pairs respectively). X axis: number of gene pairs, Y axis: number of occurrences.

Supplementary Figure 7

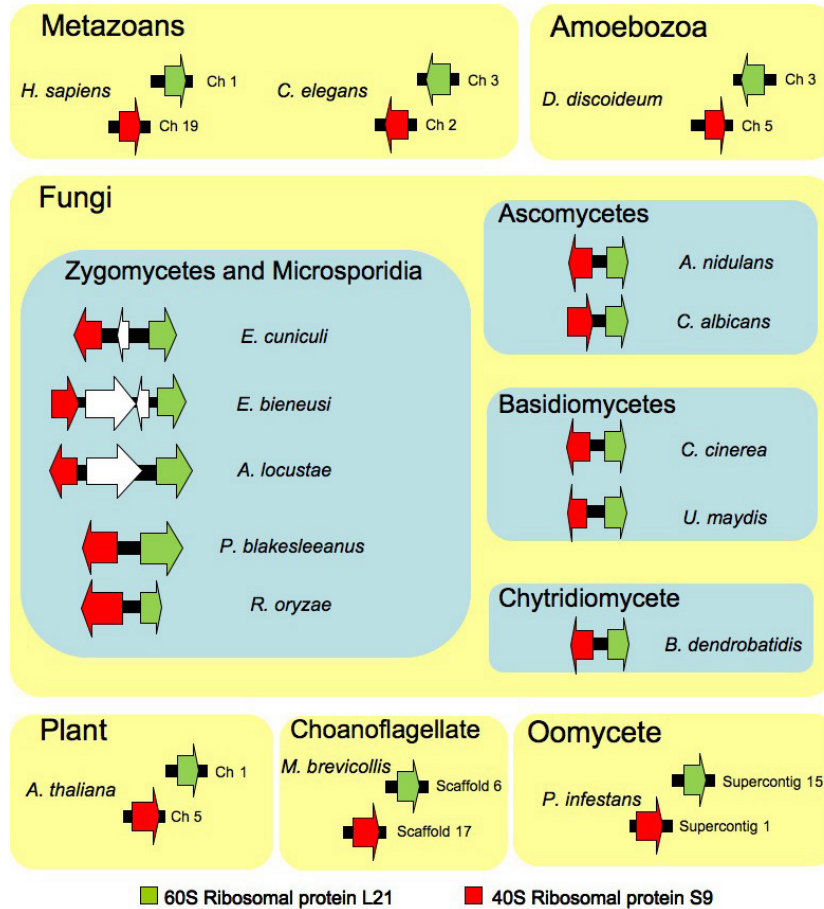

**Figure S7.** Synteny of the genes encoding 60S (L21) and 40S (S9) ribosomal proteins is fungal-specific. The synteny is conserved in ascomycetes (i.e., *Aspergillus nidulans* and *Candida albicans*), basidiomycetes (i.e., *Coprinopsis cinerea* and *Ustilago maydis*) and a chytridiomycete (i.e., *Batrachochytrium dendrobatidis*) as well as in *P. blakesleeanus*, *R. oryzae*, and the three microsporidia. However, the genes are not syntenic and are completely unlinked in metazoans (i.e., *Homo sapiens*, *Caenorhabditis elegans*), a amoebozoan (i.e., *Dictyostelium discoideum*), a choanoflagellate (i.e., *Monosiga brevicollis*), a plant (i.e., *Arabidopsis thaliana*), and an oomycete (i.e., *Phytophthora infestans*). Ch: chromosome. Gene sizes are not to scale.

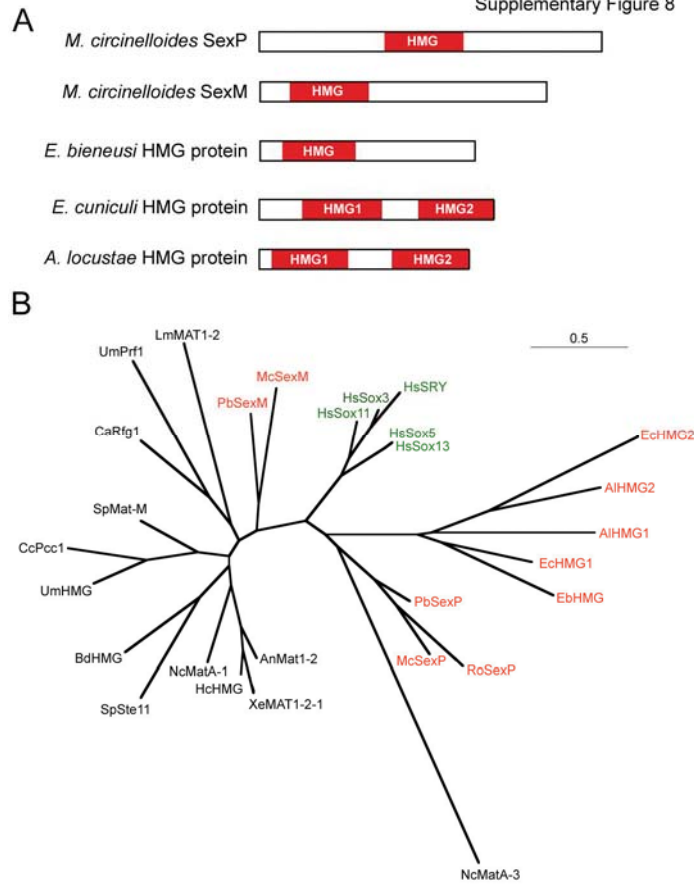

**Figure S8.** Analysis of HMG domain proteins. **(A)** *E. cuniculi* and *A. locustae* encode tandem HMG domains in a single HMG protein. However, *M. circinelloides* SexP and SexM contains a single HMG domain. *E. bieneusi*, a microsporidian, also contains only a single HMG domain in the HMG domain protein. **(B)** A maximum likelihood tree was drawn with the HMG domain sequences (approximately 70 amino acids) using ClustalW and the PHYLIP package. The tree suggests that the microsporidian HMG domain may have derived from an ancestral version of SexP. Human HMG domain proteins are shown in green. The HMG domains were identified with PROSITE tools. Scale bar indicates a branch length of 0.5 amino acid substitutions per position. An *E. cuniculi* protein with more limited HMG identity was highly diverged and is not included. Note that the alignable HMG domain is short, so none of the relationships are supported except the SexP and microsporidian clades. Ec: *Encephalitozoon cuniculi*, Al: *Antonospira locustae*, Eb: *Enterocytozoon bieneusi*, Pb: *Phycomyces blakesleeanus*, Ro: *Rhizopus oryzae*, Mc: *Mucor circinelloides*, Nc: *Neurospora crassa*, An: *Aspergillus nidulans*, Xe: *Xanthoria elegans*, Hc: *Histoplasma capsulatum*, Sp: *Schizosaccharomyces pombe*, Bd: *Batrachochytrium dendrobatidis*, Um: *Ustilago maydis*, Cc: *Coprinopsis cinerea*, Ca: *Candida albicans*, Lm: *Leptosphaeria maculans*, Hs: *Homo sapiens*.

## Supplemental References

1. Ohno, S. (1967). Sex chromosomes and sex-linked genes, (New York, NY: Springer-Verlag).
2. Katinka, M.D., Duprat, S., Cornillot, E., Metenier, G., Thomarat, F., Prensier, G., Barbe, V., Peyretailade, E., Brottier, P., Wincker, P., et al. (2001). Genome sequence and gene compaction of the eukaryote parasite *Encephalitozoon cuniculi*. Nature 414, 450-453.
